# Supplementary material
Source: HighWire-hosted journal article supplement (http://www.cmaj.ca/highwire/filestream/58298/field_highwire_adjunct_files/4/resp-falagas-5-at.pdf)
Supplement: resp-falagas-5-at.pdf [file resp-falagas-5-at.pdf]

**Appendix 5:** Adverse effects probably or possibly related to study drugs reported in the randomized controlled trials included in the meta-analysis of the effectiveness of fluoroquinolones compared with other antibiotics (part 1 of 2)

| Study                             | Adverse effects related to study drugs n/N (%) | Withdraw due to adverse events n/N (%) | Photo-sensitivity n/N (%) | Diarrhea n/N (%)             | Liver function test abnormalities n/N (%) | Headache n/N (%)           | Insomnia n/N (%)          | Rash n/N (%)              | Nausea/vomiting n/N (%)     |
|-----------------------------------|------------------------------------------------|----------------------------------------|---------------------------|------------------------------|-------------------------------------------|----------------------------|---------------------------|---------------------------|-----------------------------|
| Carbon et al <sup>1</sup>         | 97/348 (28)<br>v. 50/168 (30)                  | 13/348 (4)<br>v. 5/168 (3)             | NA                        | NA                           | NA                                        | NA                         | NA                        | 6/348 (2)<br>v. 3/168 (2) | NA                          |
| D'Ignazio et al <sup>2</sup>      | 26/212 (12)<br>v. 42/211 (20)                  | 0/212 (0)<br>v. 0/211 (0)              | NA                        | 10/212 (5)<br>v. 26/211 (12) | NA                                        | NA                         | NA                        | NA                        | < 2% in both groups         |
| Erard et al <sup>3</sup>          | 5/79 (6)<br>v. 2/37 (5)                        | 0/79 (0)<br>v. 0/37 (0)                | NA                        | 2/79 (3)<br>v. 0/37 (0)      | NA                                        | NA                         | NA                        | NA                        | 2/79 (3)<br>v. 1/37 (3)     |
| File et al <sup>4</sup>           | 17/291 (6)<br>v. 25/293 (9)                    | 8/291 (3)<br>v. 9/293 (3)              | NA                        | 4/291 (1)<br>v. 11/293 (4)   | NA                                        | NA                         | NA                        | NA                        | 1/104 (1)<br>v. 5/96 (6) *  |
| Finch et al <sup>5</sup>          | 117/301 (39)<br>v. 125/321 (39)                | 15/301 (5)<br>v. 13/321 (4)            | 0/301 (0)<br>v. 0/321 (0) | NA                           | NA                                        | NA                         | NA                        | NA                        | NA                          |
| Fogarty et al <sup>6</sup>        | 98/132 (74)<br>v. 96/137 (70)                  | 3/132 (2)<br>v. 12/137 (9)             | NA                        | NA                           | NA                                        | NA                         | NA                        | NA                        | NA                          |
| Fogarty et al <sup>7</sup>        | 84/235 (35)<br>v. 83/238 (34)                  | 6/235 (2)<br>v. 12/238 (5)             | NA                        | 19/235 (8)<br>v. 21/238 (9)  | NA                                        | NA                         | NA                        | NA                        | 21/235 (9) v.<br>19/238     |
| Frank et al <sup>8</sup>          | 6/113 (5)<br>v. 11/118 (9)                     | 5/110 (5)<br>v. 5/114 (5)              | NA                        | 0/113 (0)<br>v. 11/118 (4)   | NA                                        | NA                         | 1/113 (1)<br>v. 0/118 (0) | 1/113 (1)<br>v. 0/118 (0) | 0/113 (0)<br>v. 1/118 (1)   |
| Geijo Martinez et al <sup>9</sup> | 1/20 (5)<br>v. 2/29 (7)                        | NA                                     | NA                        | 1/20(5)<br>v. 2/29(7)        | NA                                        | NA                         | NA                        | 0/20 (0)<br>v. 1/29 (3)   | NA                          |
| Gotfried et al <sup>10</sup>      | 29/143 (20)<br>v. 41/156 (26)                  | 1/143 (1)<br>v. 2/156 (1)              | NA                        | 9/143 (6)<br>v. 9/156 (6)    | NA                                        | 6/143 (4)<br>v. 5/156 (3)  | NA                        | NA                        | 4/143 (3)<br>v. 5/156 (3)   |
| Hoeffken et al <sup>11</sup>      | 166/453 (37)<br>v. 81/222 (36)                 | 16/453 (4)<br>v. 5/222 (2)             | 0/453 (0)<br>v. 0/222 (0) | 32/453 (7)<br>v. 8/222 (4)   | 24/453 (5)<br>v. 13/222 (6)               | 11/453 (2)<br>v. 4/222 (2) | NA                        | NA                        | 33/453 (7) v.<br>17/222 (8) |
| Kalbermatter et al <sup>12</sup>  | 0/28 (0)<br>v. 0/56 (0)                        | NA                                     | NA                        | NA                           | NA                                        | NA                         | NA                        | NA                        | NA                          |
| Katz et al <sup>13</sup>          | 30/167 (18)<br>v. 27/168 (16)                  | 6/167 (4)<br>v. 3/168 (2)              | NA                        | 2/167 (1)<br>v. 10/168 (6)   | NA                                        | 2/167 (1)<br>v. 4/168 (2)  | NA                        | 3/167 (2)<br>v. 1/168 (1) | 4/167 (2)<br>v. 6/168 (4)   |

Continued

**Appendix 5:** Adverse effects probably or possibly related to study drugs reported in the randomized controlled trials included in the meta-analysis of the effectiveness of fluoroquinolones compared with other antibiotics (part 2 of 2)

| Study (ref)                    | Adverse effects related to study drugs<br>n/N (%) | Withdraw due to adverse events<br>n/N (%) | Photo-sensitivity<br>n/N (%) | Diarrhea<br>n/N (%)          | Liver function test abnormalities<br>n/N (%) | Headache<br>n/N (%)       | Insomnia<br>n/N (%)     | Rash<br>n/N (%)           | Nausea/vomiting<br>n/N (%)  |
|--------------------------------|---------------------------------------------------|-------------------------------------------|------------------------------|------------------------------|----------------------------------------------|---------------------------|-------------------------|---------------------------|-----------------------------|
| Leophonte et al <sup>14</sup>  | 31/167 (19)<br>v. 35/153 (23)                     | 14/167 (8)<br>v. 15/153 (10)              | 2/167 (1)<br>v. 0/153 (0)    | 10/167 (6)<br>v. 17/153 (11) | 1/167 (1)<br>v. 4/153 (3)                    | 1/167 (1)<br>v. 2/153 (1) | NA                      | 5/167 (3)<br>v. 3/153 (2) | 5/167 (3)<br>v. 5/153 (3)   |
| Lin et al <sup>15</sup>        | 0/26 (0)<br>v. 0/24 (0)                           | 0/26 (0)<br>v. 0/24 (0)                   | 0/26 (0)<br>v. 0/24 (0)      | 0/26 (0)<br>v. 0/24 (0)      | 0/26 (0)<br>v. 0/24 (0)                      | 0/26 (0)<br>v. 0/24 (0)   | 0/26 (0)<br>v. 0/24 (0) | 0/26 (0)<br>v. 0/24 (0)   | 0/26 (0)<br>v. 0/24 (0)     |
| Lode et al <sup>16</sup>       | 28/169 (17)<br>v. 37/172 (22)                     | 14/172 (8)<br>v. 15/173 (9)               | NA                           | 7/169 (4)<br>v. 11/172 (6)   | 7/169 (4)<br>v. 12/172 (7)                   | NA                        | NA                      | 5/169 (3)<br>v. 2/172 (1) | NA                          |
| Norrby et al <sup>17</sup>     | 68/314 (22)<br>v. 79/305 (26)                     | 15/314 (5)<br>v. 20/305 (7)               | 6/314 (2)<br>v. 3/305 (1)    | 6/314 (2)<br>v. 14/305 (5)   | 26/314 (8)<br>v. 34/305 (11)                 | NA                        | NA                      | 6/314 (2)<br>v. 3/305 (1) | 9/314 (3)<br>v. 7/305 (2)   |
| Petitpretz et al <sup>18</sup> | 56/200 (28)<br>v. 42/208 (20)                     | 8/200 (4)<br>v. 8/208 (4)                 | 0/200 (0)<br>v. 0/208 (0)    | 14/200 (7)<br>v. 8/208 (7)   | 12/200 (6)<br>v. 15/208 (7)                  | 2/200 (1)<br>v. 2/208 (2) | NA                      | 3/200 (2)<br>v. 3/208 (1) | 20/200 (10)<br>v. 2/208 (1) |
| Portier et al <sup>19</sup>    | 42/171 (25)<br>v. 50/175 (29)                     | 9/171 (5)<br>v. 10/175 (6)                | NA                           | 3/171 (2)<br>v. 32/175 (18)  | 2/171 (1)<br>v. 0/175 (0) **                 | 2/171 (1)<br>v. 0/175 (0) | NA                      | 5/171 (3)<br>v. 2/175 (1) | 7/171 (4)<br>v. 7/175 (4)   |
| Torres et al <sup>20</sup>     | 55/274 (20)<br>v. 86/279 (31)                     | 25/274 (9)<br>v. 23/279 (8)               | NA                           | 13/274 (5)<br>v. 22/279 (8)  | NA                                           | 5/274 (2)<br>v. 4/279 (1) | NA                      | NA                        | 10/274 (4)<br>v. 5/279 (2)  |
| Welte et al <sup>21</sup>      | 65/200 (33)<br>v. 76/197 (39)                     | 11/200 (6)<br>v. 18/197 (9)               | NA                           | NA                           | 18/200 (9)<br>v. 33/197 (17)                 | NA                        | NA                      | NA                        | NA                          |
| Xu et al <sup>22</sup>         | 2/20 (10)<br>v. 1/20 (5)                          | 0/20 (0)<br>v. 0/20 (0)                   | 0/20 (0)<br>v. 0/20 (0)      | 0/20 (0)<br>v. 0/20 (0)      | 0/20 (0)<br>v. 0/20 (0)                      | 0/20 (0)<br>v. 0/20 (0)   | 0/20 (0)<br>v. 0/20 (0) | 0/20 (0)<br>v. 0/20 (0)   | 1/20 (5)<br>v. 0/20 (0)     |
| Zervos et al <sup>23</sup>     | 36/102 (34)<br>v. 49/110 (39)                     | 3/102 (3)<br>v. 10/110 (9)                | NA                           | NA                           | NA                                           | NA                        | NA                      | NA                        | NA                          |
| Pooled OR (95% CI)             | 0.86<br>(0.78-0.96)                               | 0.85<br>(0.69-1.06)                       | 2.35<br>(0.67-8.24)          | 0.55<br>(0.35-0.88)          | 0.68<br>(0.51-0.91)                          | 1.76<br>(0.49-6.34)       | NA                      | 1.67<br>(0.95-2.94)       | 1.17<br>(0.69-1.98)         |

Note: CI = confidence interval, NA = not available.

\*Adverse effects reported for the clinically evaluable populations.

†Refers to cholestatic jaundice only.

‡Abnormalities detected in the results of liver function tests.

## References:

1. Carbon C, Ariza H, Rabie WJ, et al. Comparative study of levofloxacin and amoxicillin/clavulanic acid in adults with mild-to-moderate community-acquired pneumonia. *Clin Microbiol Infect* 1999;5:724-32.
2. D'Ignazio J, Camere MA, Lewis DE, et al. Novel, single-dose microsphere formulation of azithromycin versus 7-day levofloxacin therapy for treatment of mild to moderate community-acquired pneumonia in adults. *Antimicrob Agents Chemother* 2005;49:4035-41.
3. Erard V, Lamy O, Bochud PY, et al. Full-course oral levofloxacin for treatment of hospitalized patients with community-acquired pneumonia. *Eur J Clin Microbiol Infect Dis* 2004;23:82-8.
4. File TM Jr, Segreti J, Dunbar L, et al. A multicenter, randomized study comparing the efficacy and safety of intravenous and/or oral levofloxacin versus ceftriaxone and/or cefuroxime axetil in treatment of adults with community-acquired pneumonia. *Antimicrob Agents Chemother* 1997;41:1965-72.
5. Finch R, Schurmann D, Collins O, et al. Randomized controlled trial of sequential intravenous (i.v.) and oral moxifloxacin compared with sequential i.v. and oral co-amoxiclav with or without clarithromycin in patients with community-acquired pneumonia requiring initial parenteral treatment. *Antimicrob Agents Chemother* 2002;46:1746-54.
6. Fogarty C, Siami G, Kohler R, et al. Multicenter, open-label, randomized study to compare the safety and efficacy of levofloxacin versus ceftriaxone sodium and erythromycin followed by clarithromycin and amoxicillin-clavulanate in the treatment of serious community-acquired pneumonia in adults. *Clin Infect Dis* 2004;38(Suppl 1):S16-23.
7. Fogarty C, Grossman C, Williams J, et al. Efficacy and safety of moxifloxacin vs clarithromycin for community-acquired pneumonia. *Infect Med* 1999;16:748-63.
8. Frank E, Liu J, Kinasewitz G, et al. A multicenter, open-label, randomized comparison of levofloxacin and azithromycin plus ceftriaxone in hospitalized adults with moderate to severe community-acquired pneumonia. *Clin Ther* 2002;24:1292-308.
9. Geijo Martinez MP, Diaz de Tuesta Chow-Quan AM, Herranz CR, et al. Levofloxacin versus beta-lactamic therapy in community acquired pneumonia that requires hospitalization. *Med Interna* 2002;19:621-5.
10. Gotfried MH, Dattani D, Riffer E, et al. A controlled, double-blind, multicenter study comparing clarithromycin extended-release tablets and levofloxacin tablets in the treatment of community-acquired pneumonia. *Clin Ther* 2002;24:736-51.
11. Hoeffken G, Meyer HP, Winter J, et al.; Community-acquired Pneumonia Study Group. The efficacy and safety of two oral moxifloxacin regimens compared to oral clarithromycin in the treatment of community-acquired pneumonia. *Respir Med* 2001;95:553-64.
12. Kalbermatter V, Bagilet D, Diab M, et al. Oral levofloxacin versus intravenous ceftriaxone and amoxicillin/clavulanic acid in the treatment of community-acquired pneumonia that requires hospitalization. *Med Clin (Barc)* 2000;115:561-3.
13. Katz E, Larsen LS, Fogarty CM, et al. Safety and efficacy of sequential i.v. to p.o. moxifloxacin versus conventional combination therapies for the treatment of community-acquired pneumonia in patients requiring initial i.v. therapy. *J Emerg Med* 2004;27:395-405.
14. Leophonte P, File T, Feldman C. Gemifloxacin once daily for 7 days compared to amoxicillin/clavulanic acid thrice daily for 10 days for the treatment of community-acquired pneumonia of suspected pneumococcal origin. *Respir Med* 2004;98:708-20.
15. Lin TY, Lin SM, Chen HC, et al. An open label randomized comparison of levofloxacin and amoxicillin/clavulanate plus clarithromycin for the treatment of hospitalized patients with community-acquired pneumonia. *Chang Gung Med J* 2007;30:321-32.

16. Lode H, File TM Jr, Mandell L, et al.; 185 Gemifloxacin Study Group. Oral gemifloxacin versus sequential therapy with intravenous ceftriaxone/oral cefuroxime with or without a macrolide in the treatment of patients hospitalized with community-acquired pneumonia: a randomized, open-label, multicenter study of clinical efficacy and tolerability. *Clin Ther* 2002;24:1915-36.
17. Norrby SR, Petermann W, Willcox PA, et al. A comparative study of levofloxacin and ceftriaxone in the treatment of hospitalized patients with pneumonia. *Scand J Infect Dis* 1998;30:397-404.
18. Petitpretz P, Arvis P, Marel M, et al.; CAP5 Moxifloxacin Study Group. Oral moxifloxacin vs high-dosage amoxicillin in the treatment of mild-to-moderate, community-acquired, suspected pneumococcal pneumonia in adults. *Chest* 2001;119:185-95.
19. Portier H, Brambilla C, Garre M, et al. Moxifloxacin monotherapy compared to amoxicillin-clavulanate plus roxithromycin for nonsevere community-acquired pneumonia in adults with risk factors. *Eur J Clin Microbiol Infect Dis* 2005;24:367-76.
20. Torres A, Muir JF, Corris P, et al. Effectiveness of oral moxifloxacin in standard first-line therapy in community-acquired pneumonia. *Eur Respir J* 2003;21:135-43.
21. Welte T, Petermann W, Schurmann D, et al.; MOXIRAPID Study Group. Treatment with sequential intravenous or oral moxifloxacin was associated with faster clinical improvement than was standard therapy for hospitalized patients with community-acquired pneumonia who received initial parenteral therapy. *Clin Infect Dis* 2005;41:1697-705.
22. Xu S, Xiong S, Xu Y, et al. Efficacy and safety of intravenous moxifloxacin versus cefoperazone with azithromycin in the treatment of community acquired pneumonia. *J Huazhong Univ Sci Technolog Med Sci* 2006;26:421-4.
23. Zervos M, Mandell LA, Vrooman PS, et al. Comparative efficacies and tolerabilities of intravenous azithromycin plus ceftriaxone and intravenous levofloxacin with step-down oral therapy for hospitalized patients with moderate to severe community-acquired pneumonia. *Treat Respir Med* 2004;3:329-36.
